# Supplementary material for: Transcription factor ISL1 is essential for pacemaker development and function
Source: JCI journal article supplement (doi:10.1172/jci68257), 2015-07-19
Supplement: sd1 [file 1]

## **Supplemental Materials**

Supplemental Figures:

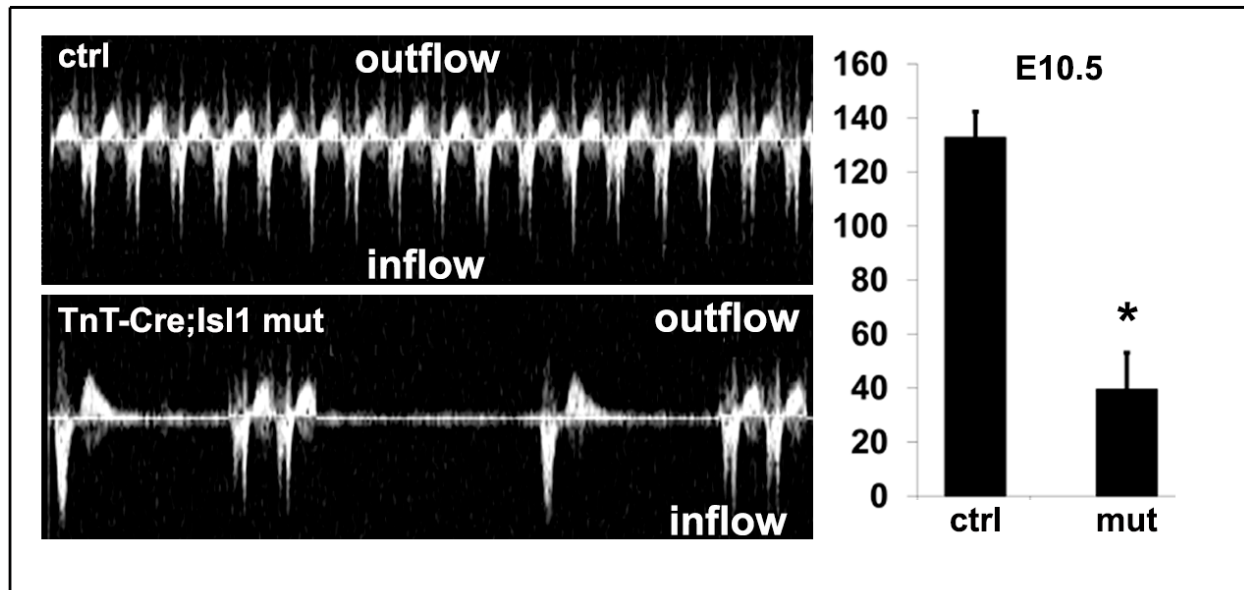

**Figure S1**

**Figure S1. Requirement for *Isl1* in differentiated myocytes for pacemaker function of the SAN.** Ablation of *Isl1* specifically in myocardial cells using *Troponin T-Cre* resulted in severe bradycardia and irregular heart rate as revealed by echocardiography. Pulse wave Doppler revealed well coupled outflow and inflow wave, suggesting no AV block.

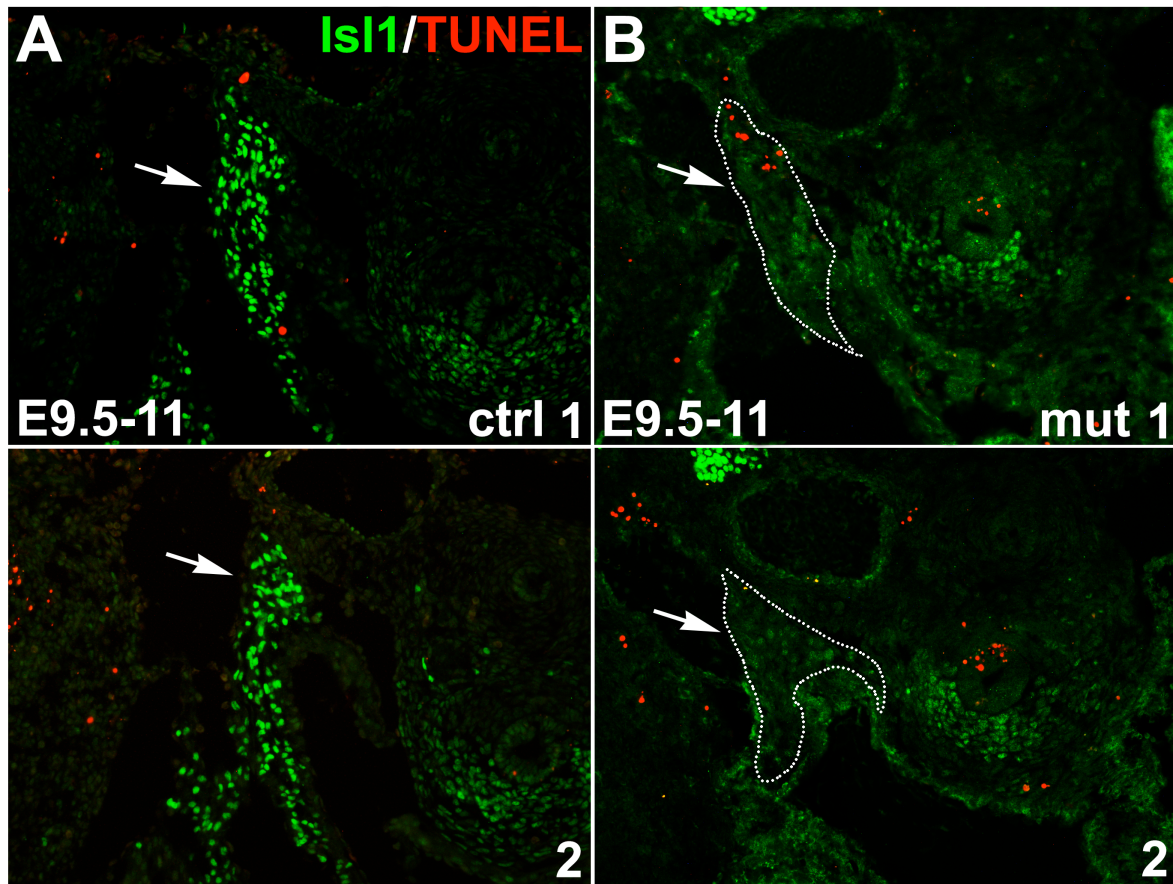

**Figure S2**

**Figure S2. Ablation of *Isl1* using *Hcn4-CreERT2* at E9.5 leads to increased cell death in the SAN.** Immunostaining demonstrated effective ablation of ISL1 expression in *Isl1* mutants at E11 (B1 and 2), but ISL1 expression in pharyngeal region and dorsal mesocardium appeared to be normal. TUNEL revealed increased cell death in *Isl1* mutant SAN (B1 and 2) compared to control littermate (A1 and 2).

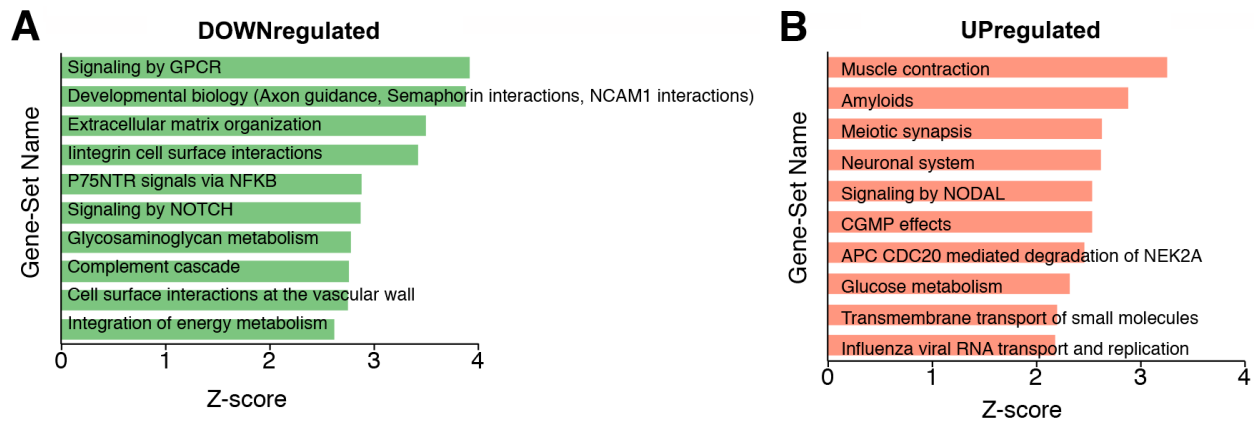

**Figure S3**

**Figure S3. REACTOME pathway enrichment analysis of DE genes in *Hcn4-CreERT2;Isl1* mutant SAN.** A) Top 10 REACTOME categories enriched of genes downregulated in *Isl1* mutant SAN. B) Top 10 REACTOME categories enriched of genes upregulated in *Isl1* mutant SAN.

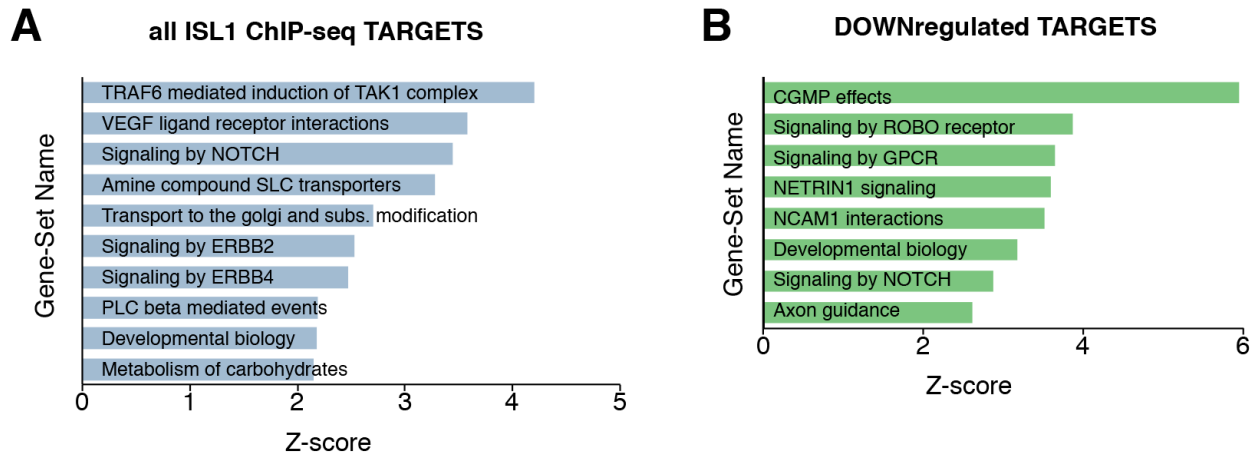

**Figure S4**

**Figure S4. REACTOME pathway enrichment analysis of ISL1 targets.** A) Top 10 REACTOME categories significantly enriched of all genes annotated with ISL1 ChIP-seq peaks. B) REACTOME categories significantly enriched of genes downregulated in *Hcn4-CreERT2;Isl1* mutant SAN cells, associated to ISL1 ChIP-seq peak. No REACTOME categories found significant enriched of genes upregulated in *Hcn4-CreERT2;Isl1* mutant SAN cells, associated to ISL1 ChIP-seq peak.
